# Supplementary material for: Expression of pH-Sensitive GPCRs in Peritoneal Carcinomatosis of Colorectal Cancer—First Results
Source: MDPI journal article supplement (doi:10.3390/jcm12051803), 2023-02-23
Supplement: s1 [file s1]

## SUPPLEMENTARY INFORMATION

### Supplementary Figure S1

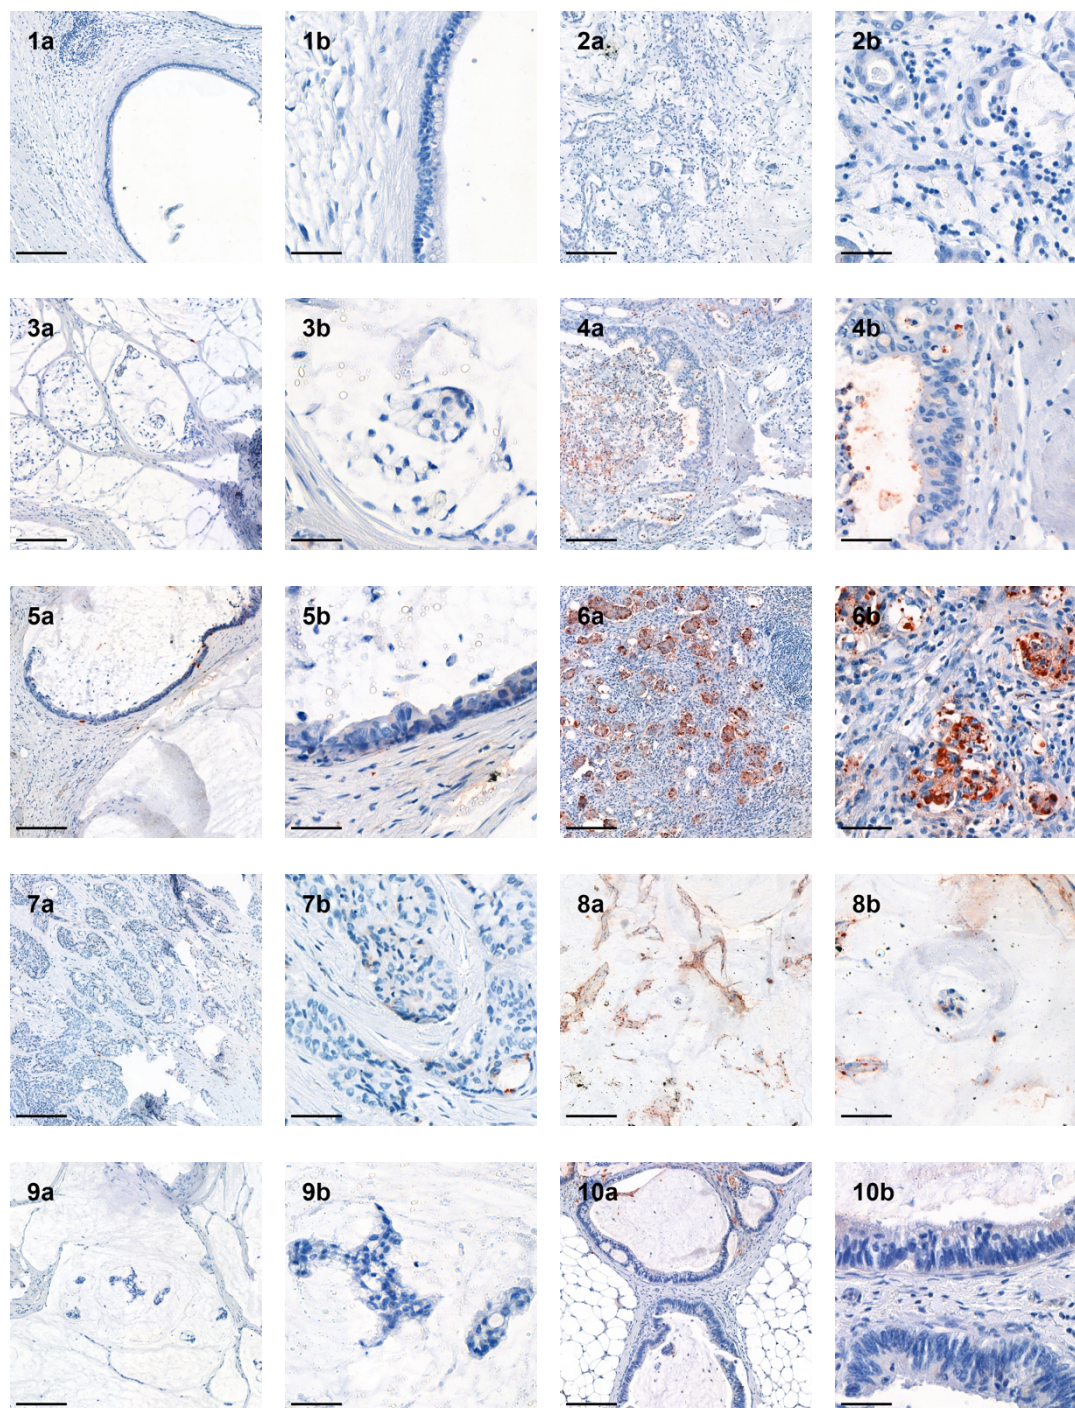

**Supplementary Figure S1: Immunohistochemistry for *GPR 4*.** The number in each slide corresponds to the patient number (compare also Table 1). “a” represents a 10-fold magnification (scale bar 200  $\mu\text{m}$ ) and “b” a 40-fold magnification (scale bar 50  $\mu\text{m}$ ).

## Supplementary Figure 2

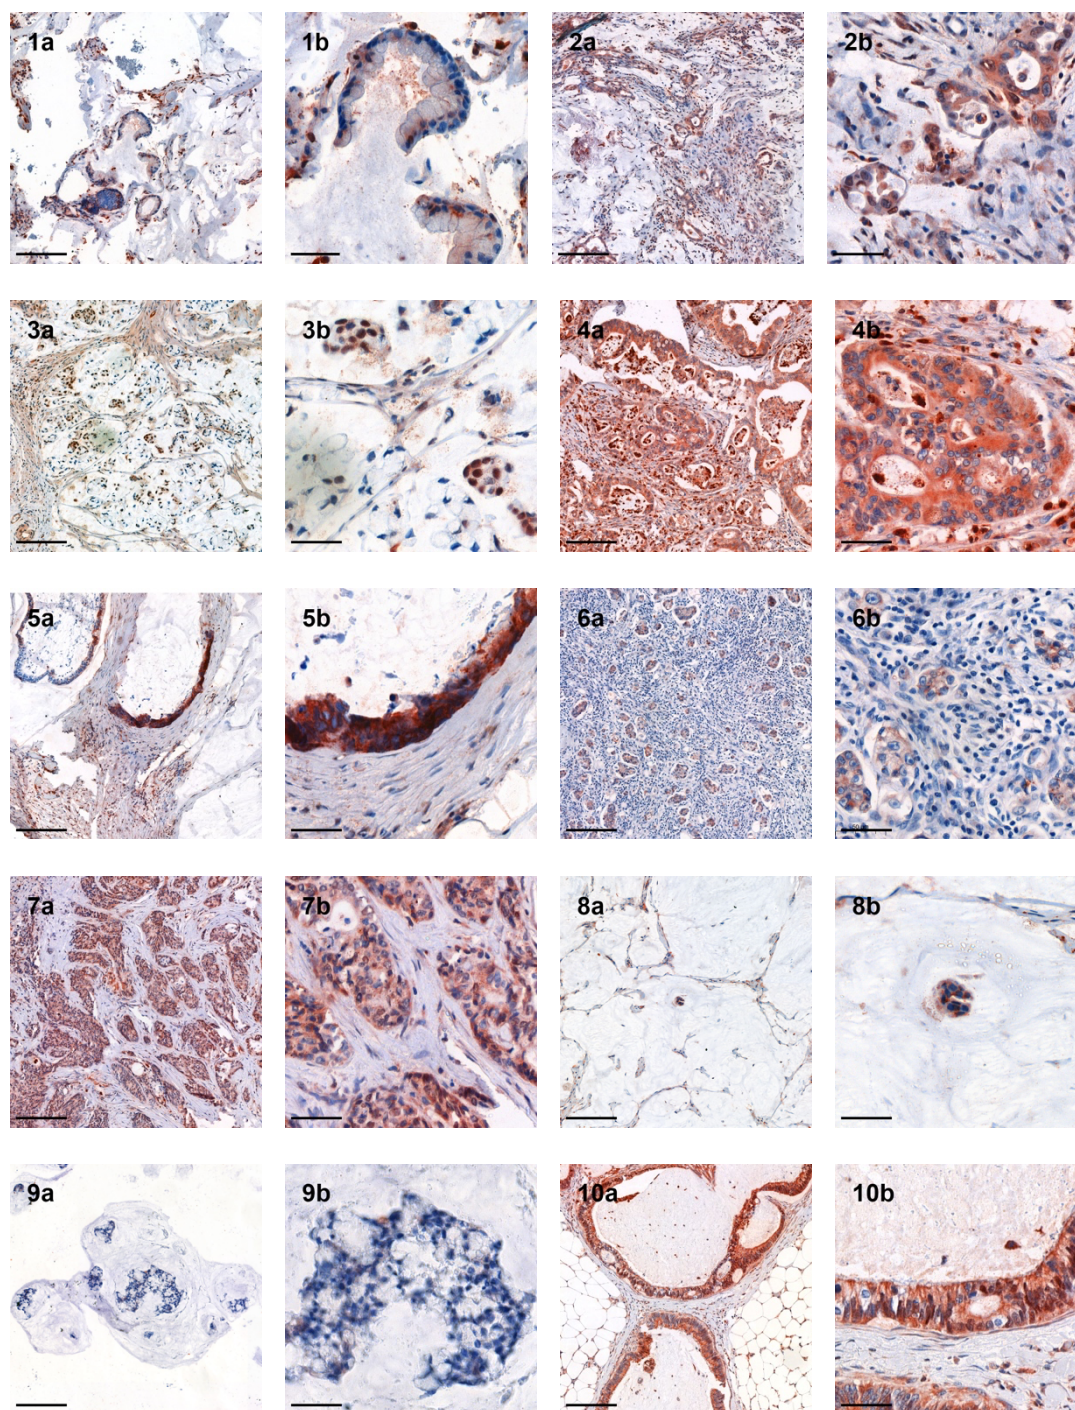

**Supplementary Figure S2: Immunohistochemistry for *GPR 65*.** The number in each slide corresponds to the patient number (compare also Table 1). “a” represents a 10-fold magnification (scale bar 200  $\mu$ m) and “b” a 40-fold magnification (scale bar 50  $\mu$ m).

# Supplementary Figure S3

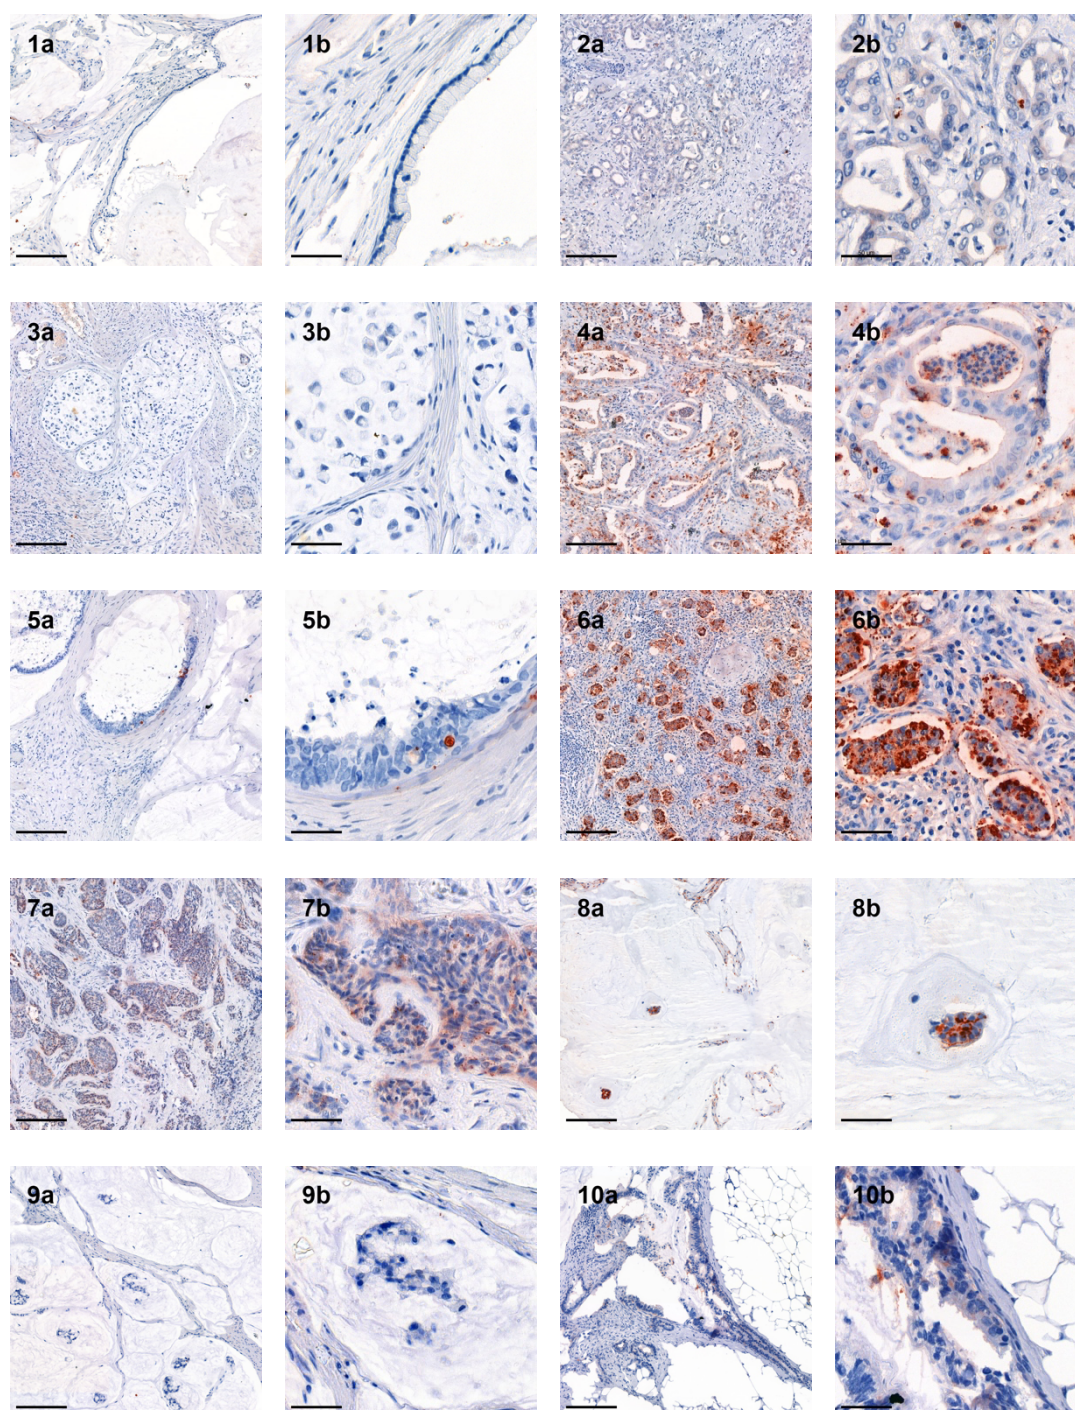

**Supplementary Figure S3: Immunohistochemistry for *GPR 68*.** The number in each slide corresponds to the patient number (compare also Table 1). “a” represents a 10-fold magnification (scale bar 200  $\mu\text{m}$ ) and “b” a 40-fold magnification (scale bar 50  $\mu\text{m}$ ).

## Supplementary Figure S4

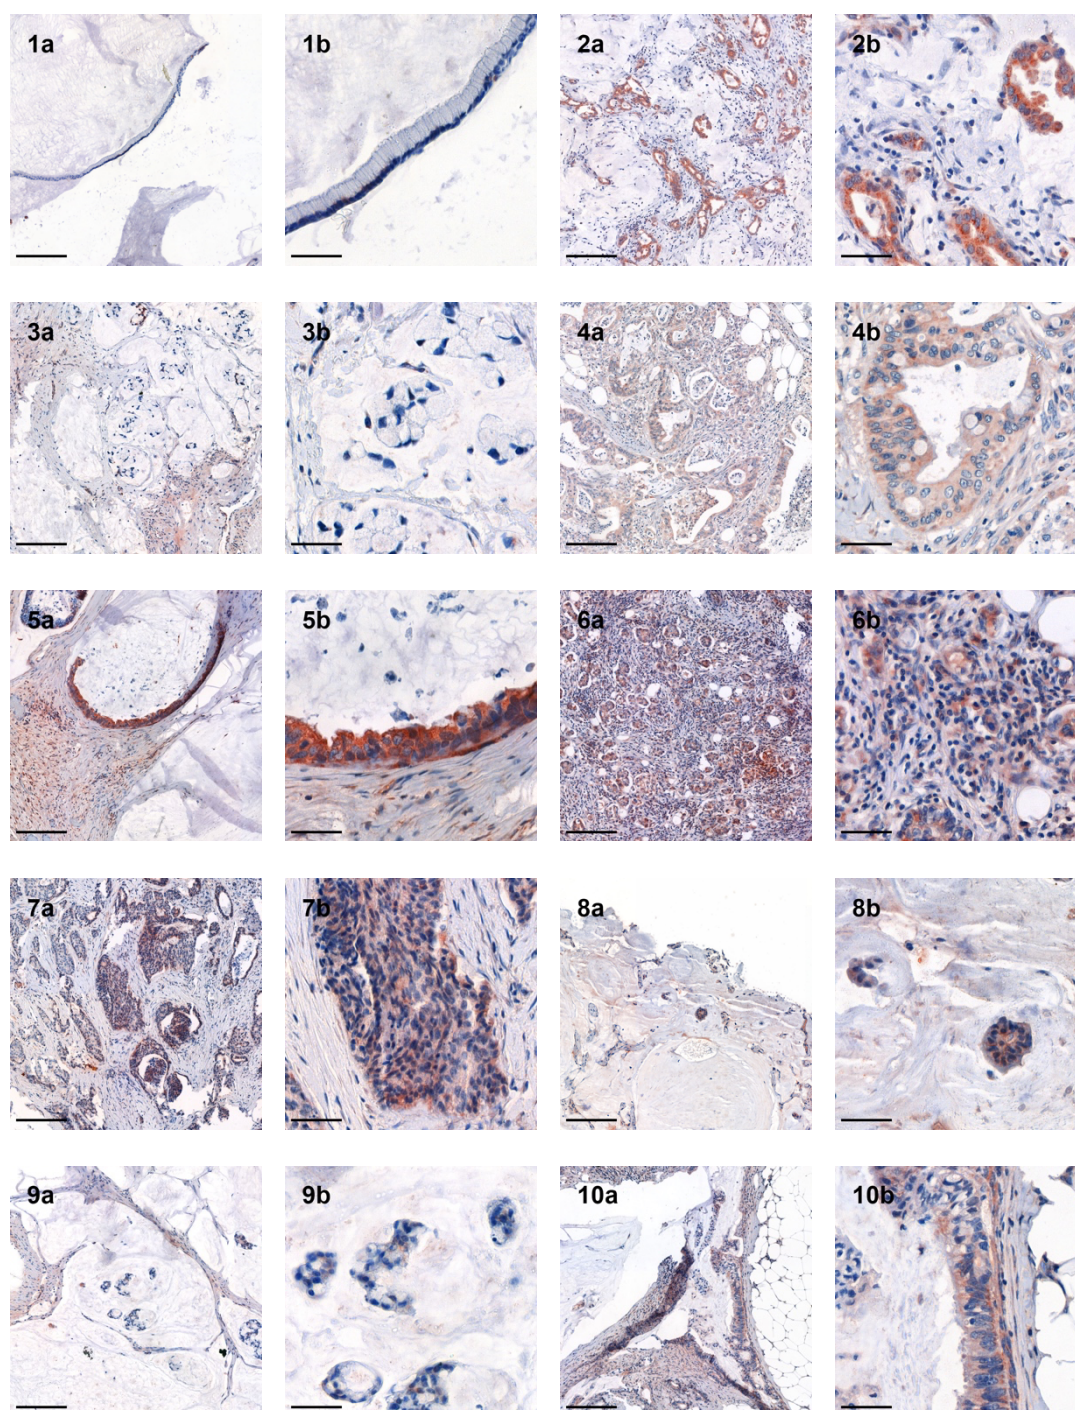

**Supplementary Figure S4: Immunohistochemistry for *GPR 132*.** The number in each slide corresponds to the patient number (compare also Table 1). “a” represents a 10-fold magnification (scale bar 200  $\mu$ m) and “b” a 40-fold magnification (scale bar 50  $\mu$ m).

## Supplementary Figure S5

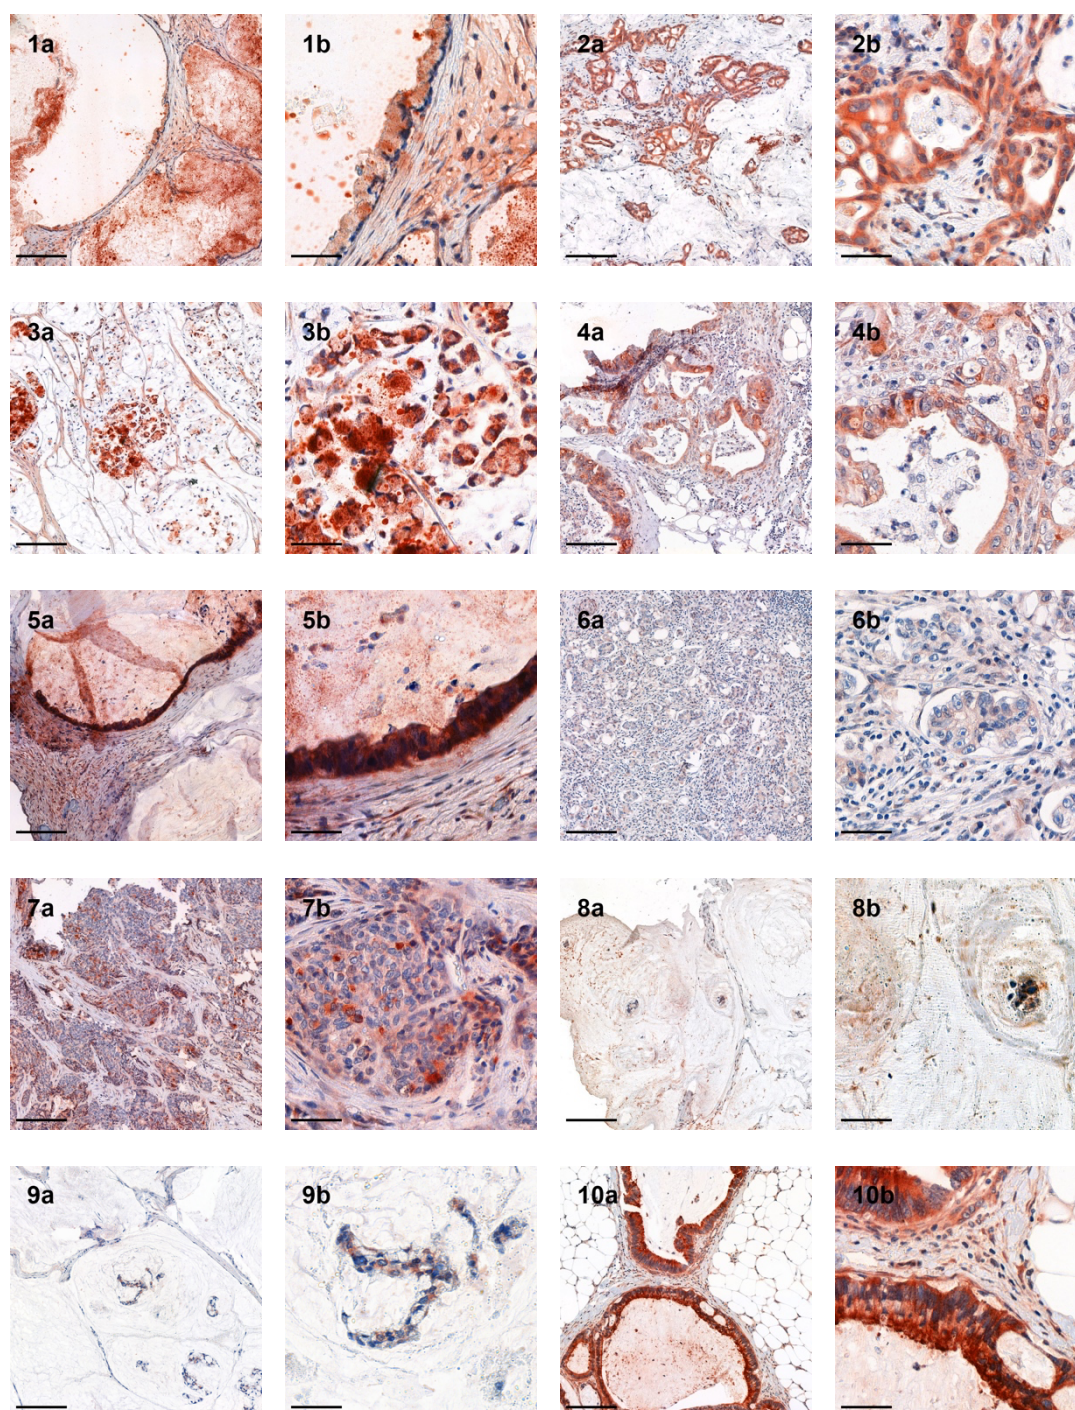

**Supplementary Figure S5: Immunohistochemistry for *GPR 151*.** The number in each slide corresponds to the patient number (compare also Table 1). “a” represents a 10-fold magnification (scale bar 200 µm) and “b” a 40-fold magnification (scale bar 50 µm).

## Supplementary Figure S6

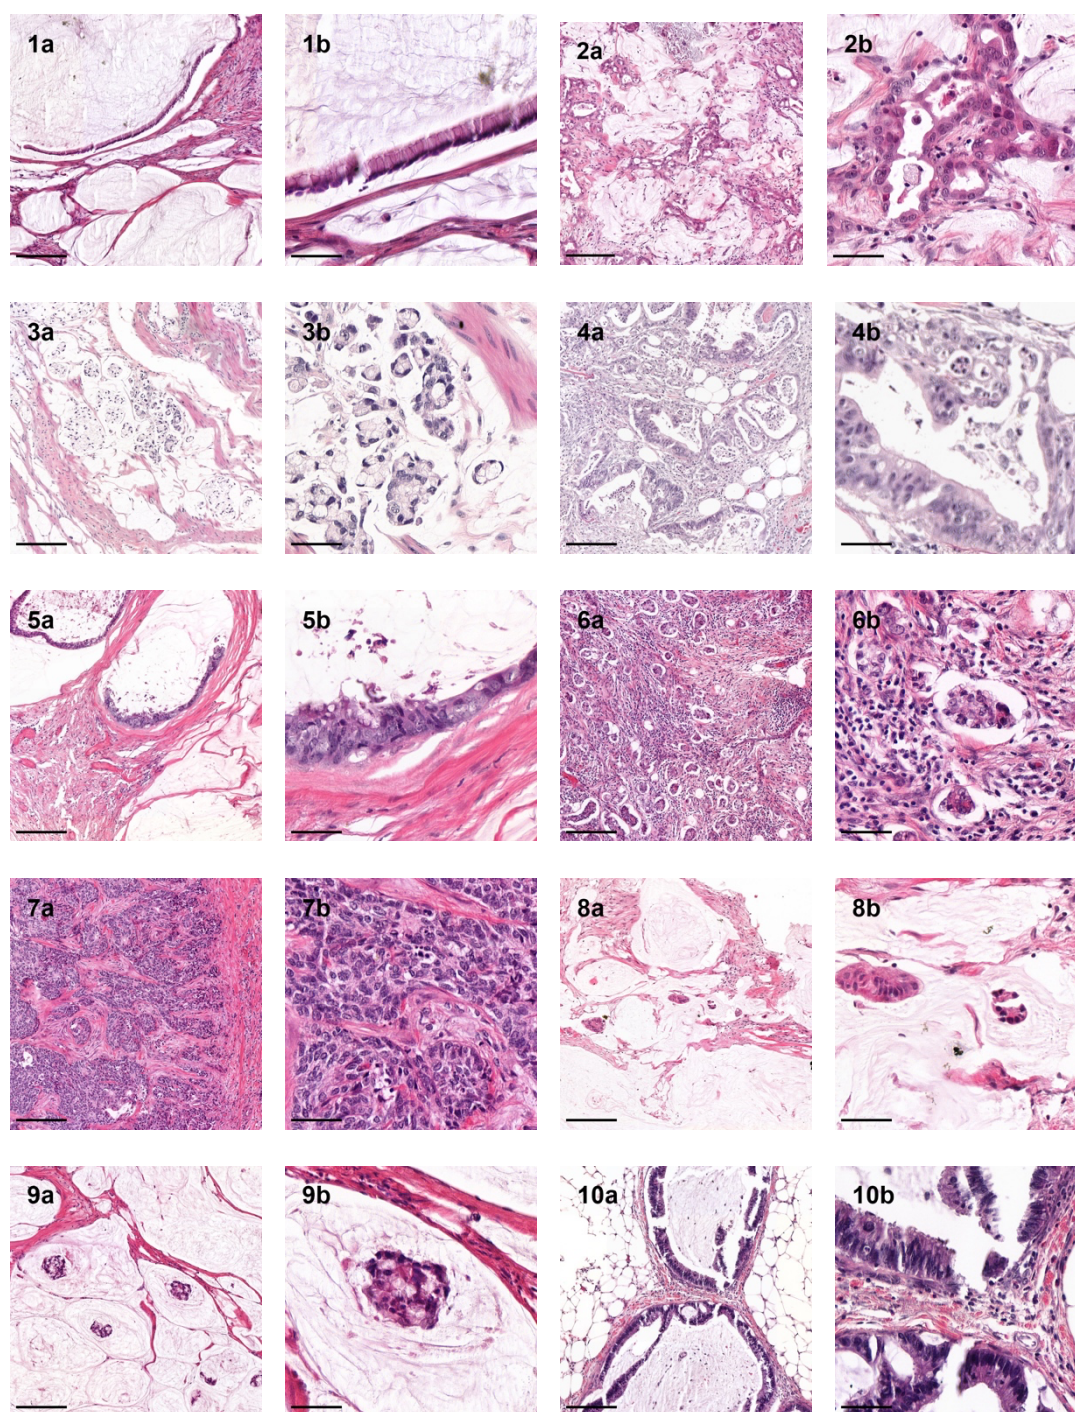

**Supplementary Figure S6: *HE* staining.** The number in each slide corresponds to the patient number (compare also Table 1). “a” represents a 10-fold magnification (scale bar 200  $\mu\text{m}$ ) and “b” a 40-fold magnification (scale bar 50  $\mu\text{m}$ ).
